# Supplementary material for: Antimony porphyrins as red-light powered photocatalysts for solar fuel production from halide solutions in the presence of air
Source: Royal Society of Chemistry journal article supplement (doi:10.1039/c5pp00238a), 2015-09-07
Supplement: c5pp00238a1.pdf [file c5pp00238a1.pdf]

## Supporting Information

# Antimony porphyrins as red-light powered photocatalysts for solar fuel production from halide solutions in the presence of air

M. Ertl, E. WöB and G. Knör \*

## Materials

Tetrabutylammonium salts  $\text{NBu}_4\text{X}$  (Fluka, X = Cl, Br, I), HBr (48 wt.% in  $\text{H}_2\text{O}$ , Aldrich) and KBr (Merck, Uvasol quality) and KI (AppliChem, p.A.) were used as the halide anion sources. The commercially available free-base porphyrin ligands *meso*-Tetraphenylporphyrin  $\text{H}_2\text{TPP}$  (Strem Chemicals), *meso*-Tetrakis-4-Methoxyphenylporphyrin  $\text{H}_2(\text{Tp-OCH}_3)\text{PP}$  (Aldrich) and Octaethyl-porphyrin  $\text{H}_2(\text{OEP})$  (Fluka) were used as received.  $\text{SbCl}_3$  (Aldrich, 99.99%) was used as metallation reagent. The low-valent antimony(III) and the high-valent antimony(V) forms of the photocatalysts were prepared according to the methods described in the literature [1,2].

In a typical procedure, 1 mmol of free-base porphyrin (ca. 0.6 g in case of  $\text{H}_2\text{TPP}$ ) was added to a suspension of 80 ml pyridine and 5 g molecular sieve (4Å). The mixture was stirred and refluxed for 30 min under Ar. After cooling to r.t., an excess of  $\text{SbCl}_3$  (30 mmol) was added. The solution was protected from light, stirred and heated under Ar for another 30 min to reach a final temperature of approximately 70 °C. During this period a colour change to brownish-green indicated the metallation process. At r.t. about 0.4 ml of  $\text{Br}_2$  were added, the mixture was stirred for 15 min and then 50 ml of  $\text{H}_2\text{O}$  were added dropwise. The hydrolysed reaction mixture was stirred for 1 h at r.t. and then evaporated to dryness. The crude reaction product was extracted with  $\text{CH}_2\text{Cl}_2$  and filtered in small portions over silica gel in a chromatography column. After completely washing out remaining free-base porphyrin with  $\text{CH}_2\text{Cl}_2$ , the product was eluted with EtOH (95 %) and crystallized. Exchange of the counteranion was achieved by treatment of the product with a 1:1 (v:v) mixture of EtOH and an aqueous 1M potassium salt solution followed by extraction with diethylether and crystallization. The nature of the axial hydroxo ligands in the antimony(V) porphyrin cations  $[(\text{P})\text{Sb}^{\text{V}}(\text{OH})_2]^+$  studied was confirmed in each case by field desorption (FD)-mass spectroscopy:

- |                                                                      |                                                             |                                                                  |
|----------------------------------------------------------------------|-------------------------------------------------------------|------------------------------------------------------------------|
| 1: $[(\text{TPP})\text{Sb}(\text{OH})_2]^+$ :                        | $\text{C}_{44}\text{H}_{30}\text{N}_4\text{O}_2\text{Sb}^+$ | 767 (100%, $\text{M}^+$ ), 733 (20%, $[\text{M}-2\text{OH}]^+$ ) |
| 2: $[(\text{T}(p\text{-OCH}_3)\text{PP})\text{Sb}(\text{OH})_2]^+$ : | $\text{C}_{48}\text{H}_{38}\text{N}_4\text{O}_6\text{Sb}^+$ | 887 (35%, $\text{M}^+$ ), 853 (100%, $[\text{M}-2\text{OH}]^+$ ) |
| 3: $[(\text{OEP})\text{Sb}(\text{OH})_2]^+$ :                        | $\text{C}_{36}\text{H}_{46}\text{N}_4\text{O}_2\text{Sb}^+$ | 687 (16%, $\text{M}^+$ ), 653 (100%, $[\text{M}-2\text{OH}]^+$ ) |

Hydrogen peroxide was determined quantitatively by the peroxidase-catalyzed oxidation of 4-aminophenazone in the presence of chromotropic acid [3]. For semiquantitative reaction control, colorimetric test strips (Merck Millipore) indicating light-mediated H<sub>2</sub>O<sub>2</sub> accumulation in the range 0.5 - 2 - 5 - 10 - 25 mg/l were also employed.

Reactions and measurements in microheterogeneous medium were carried out in dilute aqueous micellar solutions (1.4 mM) of the nonionic surfactant 4-(1,1,3,3-Tetramethylbutyl)phenylpolyethylene glycol (Triton X-100, Roth), which displays a critical micelle concentration (CMC) of 0.24 mM [4] :

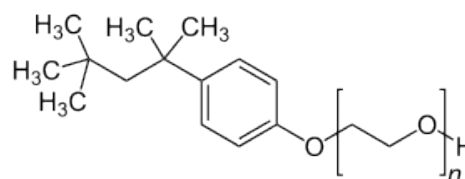

Silica gel supported antimony(V) porphyrin photocatalysts [5] were prepared according to the following modified procedure:

4 mg of [(T(*p*-OCH<sub>3</sub>)PP)Sb(OH)<sub>2</sub>]Cl (**2**) were dissolved in 25 ml EtOH (Merck, Uvasol). A 10 ml sample of the dark green solution was slowly added to 1.6 g of silica gel (0.060-0.200 mm, pore size 60 Å, Acros) in a beaker and gently mixed. Evaporation of the solvent after 2 days resulted in a bright-green powder carrying the immobilized multielectron transfer sensitizer **2** (surface modified SiO<sub>2</sub> containing 0.1 wt.% [(T(*p*-OCH<sub>3</sub>)PP)Sb(OH)<sub>2</sub>]<sup>+</sup>).

**Spectroscopic properties of the Photocatalysts 1-3** (data from refs. [6,7] unless otherwise stated):

**Table S1:** Absorption maxima of the [(P)Sb<sup>V</sup>(OH)<sub>2</sub>]<sup>+</sup> photocatalysts at 298K in ethanol solution

| Porphyrin-ligand (P)              | $\lambda_{\max} / \text{nm}$<br>( $10^{-3} \epsilon / \text{L mol}^{-1} \text{cm}^{-1}$ ) |                                                            |                                                | HW / $\text{cm}^{-1}$ *<br>B (Soret) |
|-----------------------------------|-------------------------------------------------------------------------------------------|------------------------------------------------------------|------------------------------------------------|--------------------------------------|
|                                   | <i>N</i>                                                                                  | <i>B</i> (Soret)                                           | <i>Q</i>                                       |                                      |
| TPP                               | 314, 356 <i>s</i><br>(12.9) (7.0)                                                         | 366 <i>s</i> , 397 <i>s</i> , 419<br>(4.5) (20.8) (316.2)  | 512 <i>s</i> , 552, 591<br>(2.1) (11.8) (6.4)  | 600                                  |
| T( <i>p</i> -OCH <sub>3</sub> )PP | 319, --<br>(14.9)                                                                         | -- , 383 <i>s</i> , 436<br>(20.4) (149.8)                  | 523 <i>s</i> , 561, 609<br>(3.1) (10.0) (16.0) | 1500                                 |
| OEP                               | 288, --<br>(3.0)                                                                          | 346 <i>s</i> , 377 <i>s</i> , 397<br>(10.7) (33.7) (267.5) | 494 <i>s</i> , 530, 570<br>(1.3) (10.7) (10.6) | 500                                  |

\* HW: half-width

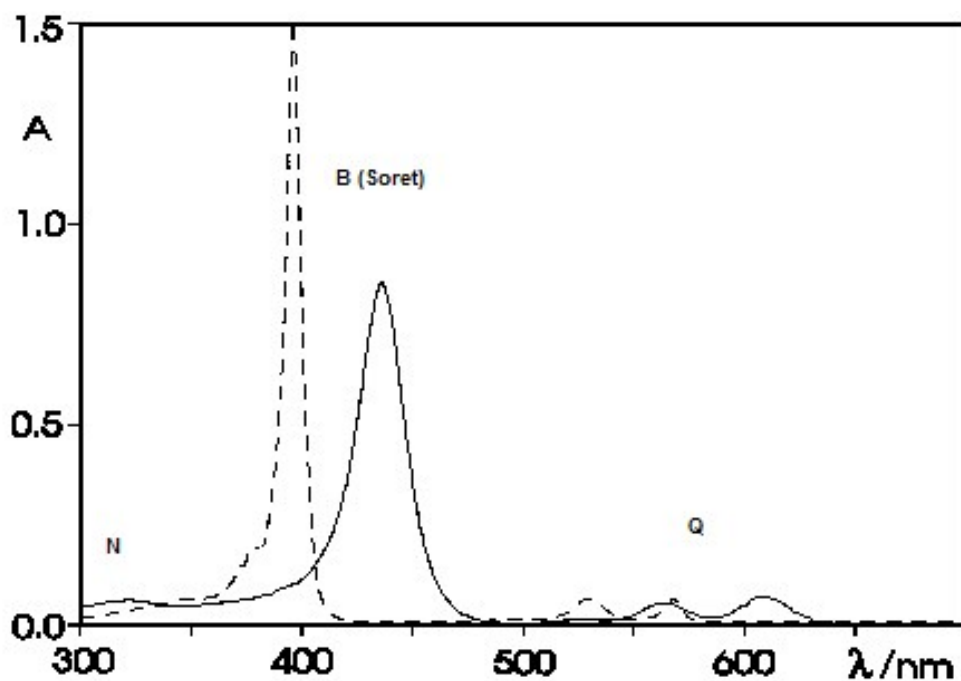

**Fig. S1:** UV-Vis absorption spectra of  $[(T(p\text{-OCH}_3)\text{PP})\text{Sb}^{\text{V}}(\text{OH})_2]\text{Cl}$ , **2** (—) and  $[(\text{OEP})\text{Sb}^{\text{V}}(\text{OH})_2]\text{Cl}$ , **3** (---) at 298K in ethanol solution ( $5.6 \times 10^{-6}\text{M}$ , 1cm cell). For compound **1** see ref. [7].

**Table S2:** Fluorescence properties of the  $[(\text{P})\text{Sb}^{\text{V}}(\text{OH})_2]^+$  photocatalysts at 298K in ethanol solution

| Porphyrin-ligand (P)              | $\lambda_{\text{max}} / \text{nm}$ |                 | $\phi_{\text{F}}$ |       | $\tau_{\text{F}} / \text{ns}$ | Stokes shift / $\text{cm}^{-1}$ |       |
|-----------------------------------|------------------------------------|-----------------|-------------------|-------|-------------------------------|---------------------------------|-------|
|                                   | $S_2$                              | $S_1$           | $S_2$             | $S_1$ | $S_1$                         | $S_2$                           | $S_1$ |
| TPP                               | 428                                | 596, 651, 720 s | 0001              | 0.035 | 1.46                          | 500                             | 100   |
| T( <i>p</i> -OCH <sub>3</sub> )PP | 450                                | 627, 670 s, --  | $\sim 10^{-4}$    | 0.012 | 1.1 *                         | 700                             | 400   |
| OEP                               | --                                 | 573, 628, 680 s | --                | 0.025 | 1.05                          | --                              | 100   |

\* in water containing Triton X100

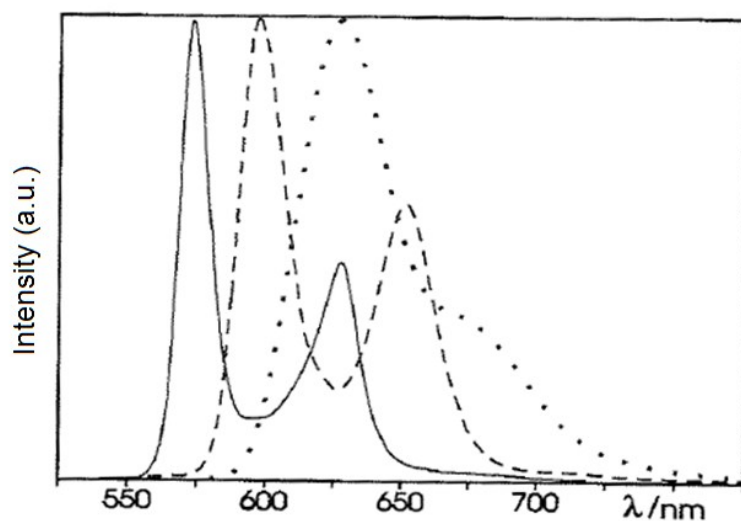

**Fig. S2:**  $S_1$ -state (Q-band) fluorescence spectra of  $[(\text{TPP})\text{Sb}^{\text{V}}(\text{OH})_2]\text{Cl}$ , **1** (---),  $[(\text{T}(p\text{-OCH}_3)\text{PP})\text{Sb}^{\text{V}}(\text{OH})_2]\text{Cl}$ , **2** (···) and  $[(\text{OEP})\text{Sb}^{\text{V}}(\text{OH})_2]\text{Cl}$ , **3** (—) at 298K in ethanol solution.

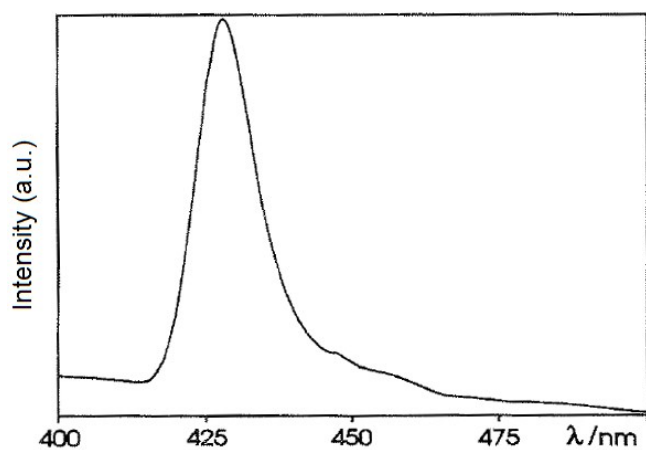

**Fig. S3:**  $S_2$ -state (B-band) fluorescence spectrum of  $[(\text{TPP})\text{Sb}^{\text{V}}(\text{OH})_2]\text{Cl}$ , **1** at 298K in ethanol solution (data from ref.[6], for more details see also ref. [8]).

**Table S3:** Low-temperature luminescence properties of the [(P)Sb<sup>V</sup>(OH)<sub>2</sub>]<sup>+</sup> photocatalysts **1-3** at 77K in 95% ethanol glass matrix.

| Porphyrin-ligand (P)              | $\lambda_{\max} / \text{nm}$ |            | $\Phi_{\text{rel}}$<br>( $S_1/T_1$ ) | $\tau_{\text{P}} / \text{ms}$<br>$T_1$ | Stokes shift / $\text{cm}^{-1}$<br>$T_1$ | $E / \text{eV}$ |       |
|-----------------------------------|------------------------------|------------|--------------------------------------|----------------------------------------|------------------------------------------|-----------------|-------|
|                                   | $S_1(0,0)$                   | $T_1(0,0)$ |                                      |                                        |                                          | $S_1$           | $T_1$ |
| TPP                               | 594                          | 760        | ~80                                  | 0.8 / 12 *                             | 3700                                     | 2.09            | 1.64  |
| T( <i>p</i> -OCH <sub>3</sub> )PP | 618                          | 810        | ~140                                 | 1.1 / 6.2 *                            | 3800                                     | 2.01            | 1.53  |
| OEP                               | 570                          | 704        | 2.7                                  | 37                                     | 3300                                     | 2.18            | 1.76  |

\* double exponential fit

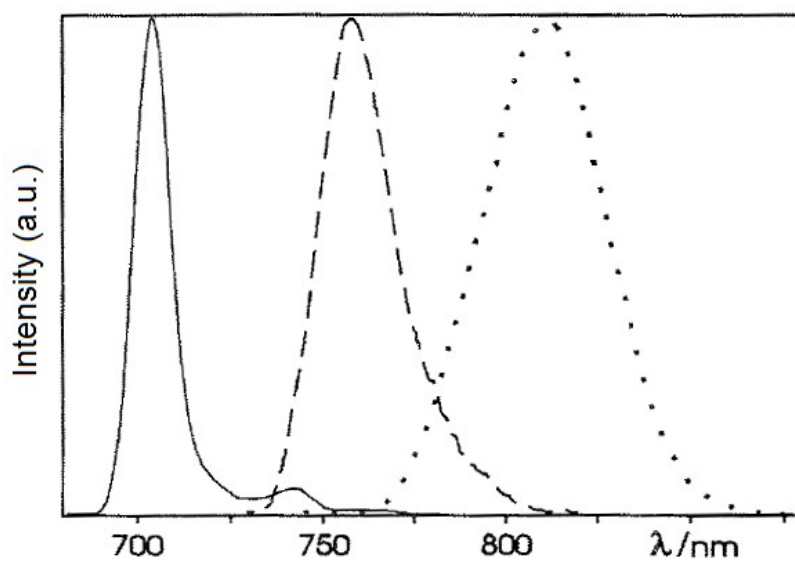

**Fig. S4:** T<sub>1</sub>-state phosphorescence spectra of [(TPP)Sb<sup>V</sup>(OH)<sub>2</sub>]Cl, **1** (---), [(T(*p*-OCH<sub>3</sub>)PP)Sb<sup>V</sup>(OH)<sub>2</sub>]Cl, **2** (···) and [(OEP)Sb<sup>V</sup>(OH)<sub>2</sub>]Cl, **3** (—) at 77K in 95% ethanol glass matrix (data from ref.[6]).

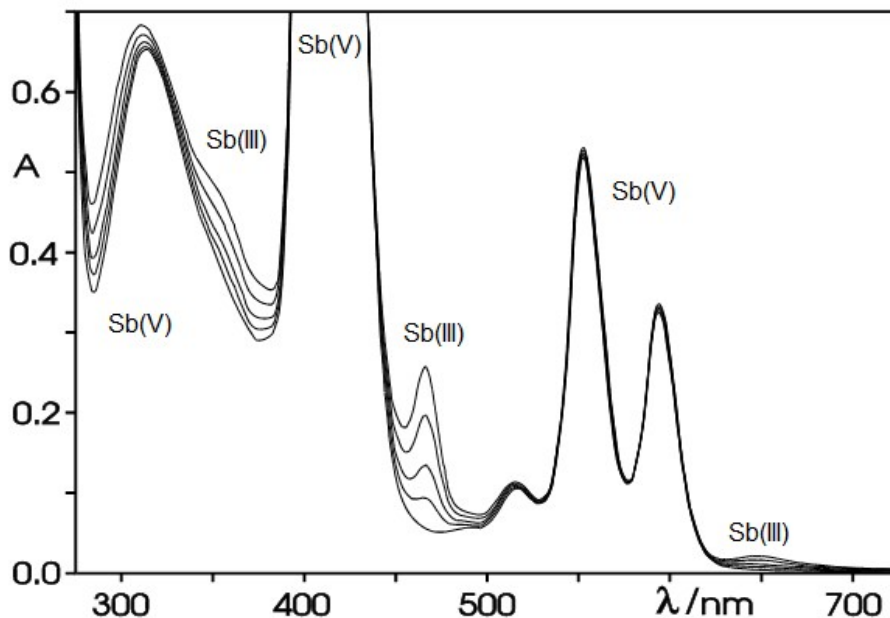

**Fig. S5:** Formation of the low-valent complex  $[(\text{TPP})\text{Sb}^{\text{III}}]^+$  with a Soret-band maximum at 465nm [1] during 590 nm irradiation of  $[(\text{TPP})\text{Sb}^{\text{V}}(\text{OH})_2]^+$ , **1** in the presence of iodide in excess. Reaction conditions: 1cm cell,  $6 \times 10^{-5}$  M compound **1**,  $10^{-2}$  M  $\text{Bu}_4\text{NI}$ , acetonitrile, air, 298K at  $t = 0, 5, 10, 20$  and 60s photolysis times ( $5.8\text{mW}/\text{cm}^2$ ).

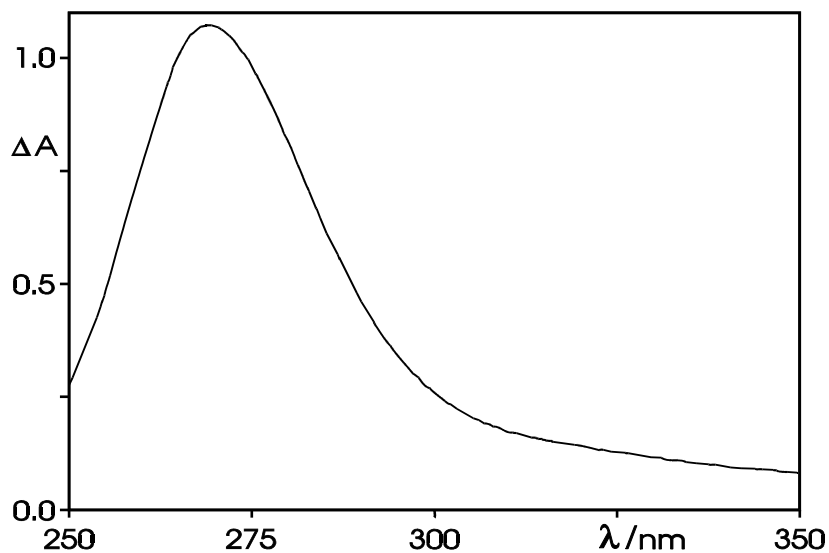

**Fig. S6:** Difference spectrum of a photolyzed solution containing  $9.3 \times 10^{-5}$  M  $[(\text{OEP})\text{Sb}^{\text{V}}(\text{OH})_2]^+$ , **3** and  $5 \times 10^{-2}$  M  $\text{Bu}_4\text{NBr}$  in air saturated acetonitrile at 298K. Irradiation at 546nm resulted in the production of the two-electron oxidation product tetrabutylammonium tribromide ( $\lambda_{\text{max}} = 269$  nm).

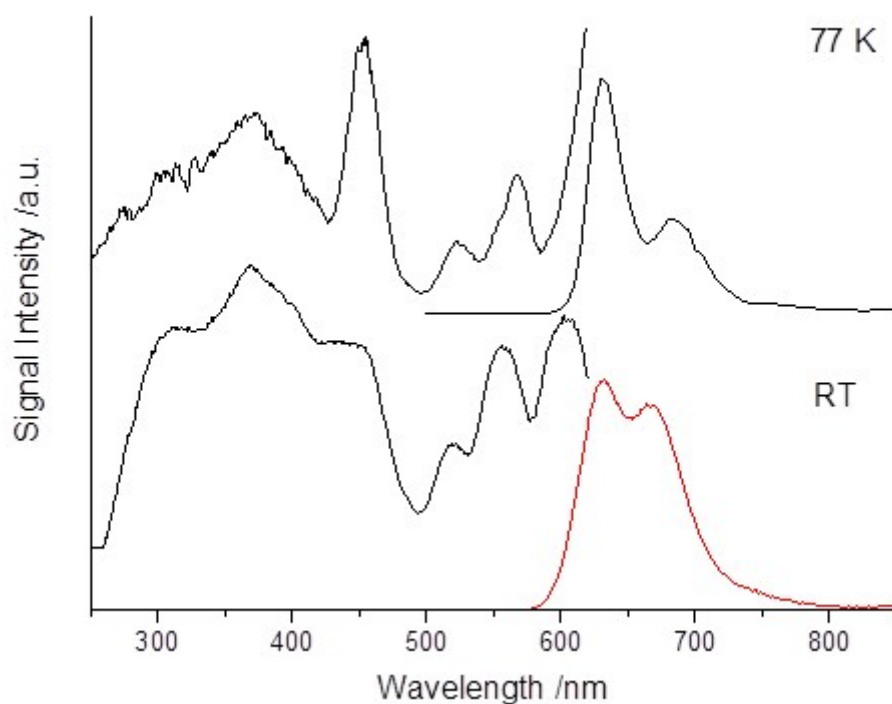

**Fig. S7:** Emission and excitation spectra of the silica gel immobilized antimony porphyrin complex **2** (solid sample of the surface modified SiO<sub>2</sub> containing 0.1 wt.% [(T(*p*-OCH<sub>3</sub>)PP)Sb(OH)<sub>2</sub>]<sup>+</sup>).

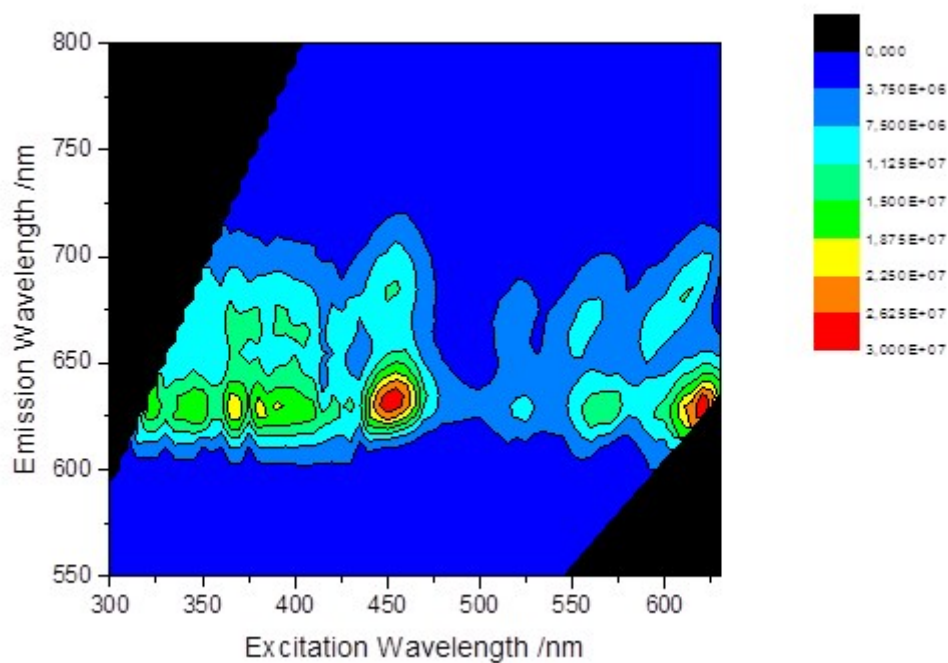

**Fig. S8:** 2D-plot of the 77K emission and excitation spectra of the silica gel immobilized antimony porphyrin complex **2** (solid sample of SiO<sub>2</sub> containing 0.1 wt.% [(T(*p*-OCH<sub>3</sub>)PP)Sb(OH)<sub>2</sub>]<sup>+</sup>).

## Solar photochemical experiments with immobilized photocatalysts:

“AM 1.5” samples were exposed to simulated sunlight (SolSim, Luzchem) closely matching the intensity of one sun at a solar zenith angle of  $z = 48.2^\circ$  (1.5 AirMass filter):

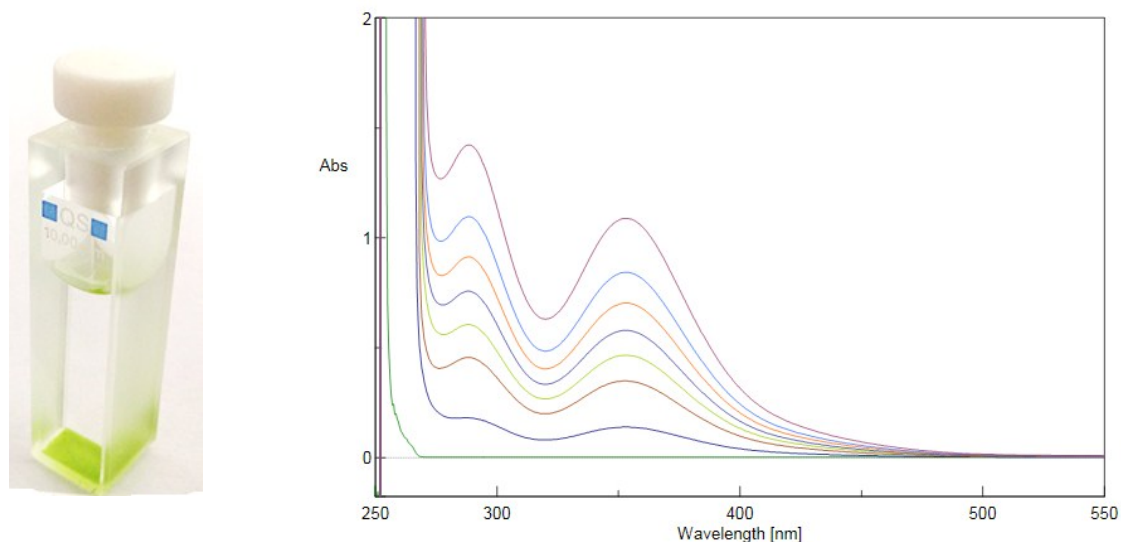

**Fig. S9:** Cuvette containing a 1M KI solution covering a 30 mg sample of the surface modified  $\text{SiO}_2$  with 0.1 wt.%  $[(\text{T}(p\text{-OCH}_3)\text{PP})\text{Sb}(\text{OH})_2]^+$  (**2**) before exposure to AM 1.5 light of the solar simulator. Right side: Photocatalyzed formation of potassium triiodide in the first 40 min of simulated sunlight exposure.

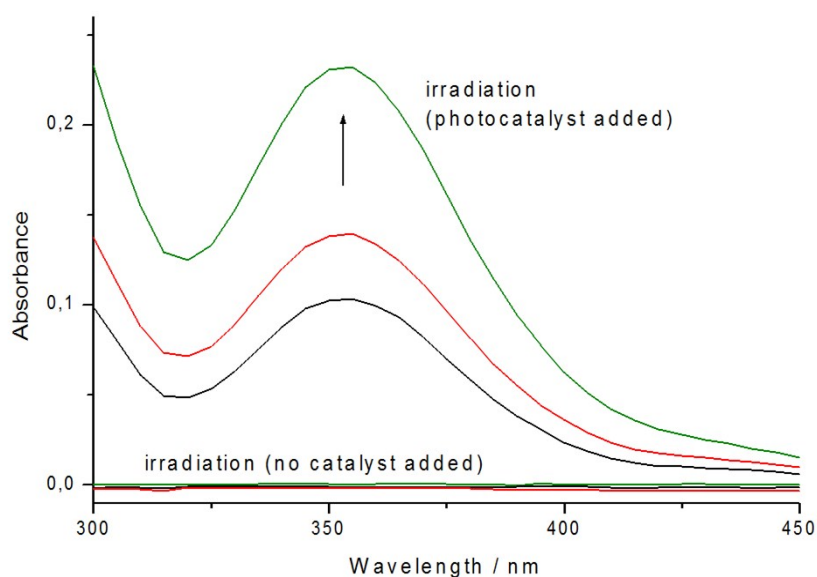

**Fig. S10:** Control experiment comparing the results of simultaneous visible light exposure of two samples of an aerobic 1M KI solution in the absence and presence of 30 mg of surface modified  $\text{SiO}_2$  with 0.1 wt.% of photocatalyst **2** (irradiation  $> 590$  nm).



Triiodide monitored by the product absorption band emerging at 352 nm (Fig. S10) is only formed in the sample containing the photocatalyst. Conditions: 1 cm quartz cells with teflon stopper placed on an optical bench in the beam of a 150W Xe lamp equipped with a IR-water filter to avoid heating of the solutions and a cutoff filter ( $> 590$  nm) to ensure exposure to long-wavelength light only. For the experiment shown, both samples containing a freshly prepared KI solution were exposed next to each other centered in one sample holder to the red-light beam under essentially identical conditions.

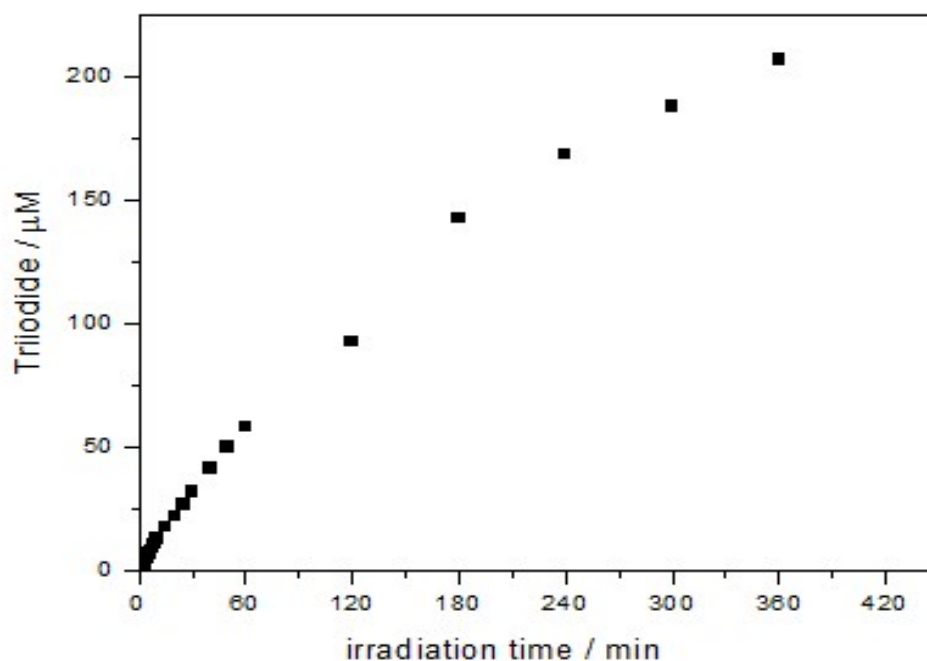

**Fig. S11:** Formation of triiodide upon 6h exposure to simulated sunlight (AM 1.5) in a stoppered Cuvette containing a 1M KI solution and 30 mg of the surface modified  $\text{SiO}_2$  with 0.1wt.% **2**.

The photocatalyst showed an identical initial rate after harvesting the triiodide solution and exchanging the supernatant for a fresh 1M potassium iodide solution.

## References:

- [1] G. Knör, A. Vogler, *Inorg. Chem.* 33 (1994) 314.
- [2] H. Inoue, T. Okamoto, Y. Kameo, M. Sumitani, A. Fujiwara, D. Ishibashi, M. Hida, *J. Chem. Soc., Perkin. Trans. 1* (1994) 105.
- [3] F. Meattini in: *Methods of Enzymatic Analysis, Vol. VII* (Ed.: H. U. Bergmeyer), VCH, Weinheim, 1985, pp. 566.
- [4] A. Chattopadhyay, E. London, *Anal. Biochem.* 15 (1984) 1144.
- [5] T. Shiragami, Y. Shimizu, K. Hinoue, Y. Fueta, K. Nobuhara, I. Akazaki, M. Yasuda, *J. Photochem. Photobiol. A: Chem.* 156 (2003) 115.
- [6] G. Knör, Dissertation, University of Regensburg, 1994.
- [7] G. Knör, *Chem. Phys. Lett.* 330 (2000) 383.
- [8] M. Fujitsuka, D. W. Cho, T. Shiragami, M. Yasuda, T. Majima, *J. Phys. Chem. B, Lett.* 110, (2006) 9386.
